# Supplementary material for: Fungal artificial chromosomes for mining of the fungal secondary metabolome
Source: PubMed Central journal article supplement (PMC4413528; doi:10.1186/s12864-015-1561-x), 2015-04-29
Supplement: 12864_2015_1561_MOESM1_ESM.pdf [file 12864_2015_1561_MOESM1_ESM.pdf]

1 **Additional file\_1**

2

3 **Fungal artificial chromosome mining of the fungal secondary metabolome**

4

5

6

7 Jin Woo Bok<sup>1,†</sup>, Rosa Ye<sup>2,4,†</sup>, Kenneth D Clevenger<sup>3,†</sup>, David Mead<sup>4</sup>, Megan Wagner<sup>4</sup>,  
8 Amanda Krerowicz<sup>4</sup>, Jessica C Albright<sup>5</sup>, Anthony W Goering<sup>6</sup>, Paul M Thomas<sup>3,6</sup>, Neil L  
9 Kelleher<sup>3,5,6\*</sup>, Nancy P Keller<sup>1\*</sup>, Chengcang C Wu<sup>2,4\*</sup>

10

11 <sup>1</sup>Department of Medical Microbiology and Immunology and Bacteriology, University of  
12 Wisconsin at Madison, Madison, Wisconsin, USA. <sup>2</sup>Intact Genomics, Inc. St Louis,  
13 Missouri, USA. <sup>3</sup>Proteomics Center of Excellence, Northwestern University, Evanston,  
14 Illinois, USA. <sup>4</sup>Lucigen Corporation, Middleton, Wisconsin, USA. <sup>5</sup>Department of  
15 Chemistry, Northwestern University, Evanston, Illinois, USA. <sup>6</sup>Department of Molecular  
16 Biosciences, Northwestern University, Evanston, Illinois, USA.

17

18 †These authors contributed equally to this work.

19 \*Correspondence should be addressed to CCW ([cwu@intactgenomics.com](mailto:cwu@intactgenomics.com)), NPK  
20 ([npkeller@wisc.edu](mailto:npkeller@wisc.edu)), or NLK ([n-kelleher@northwestern.edu](mailto:n-kelleher@northwestern.edu))

21

22

23

24

25

26 **Supplementary Figures**

27 **a**

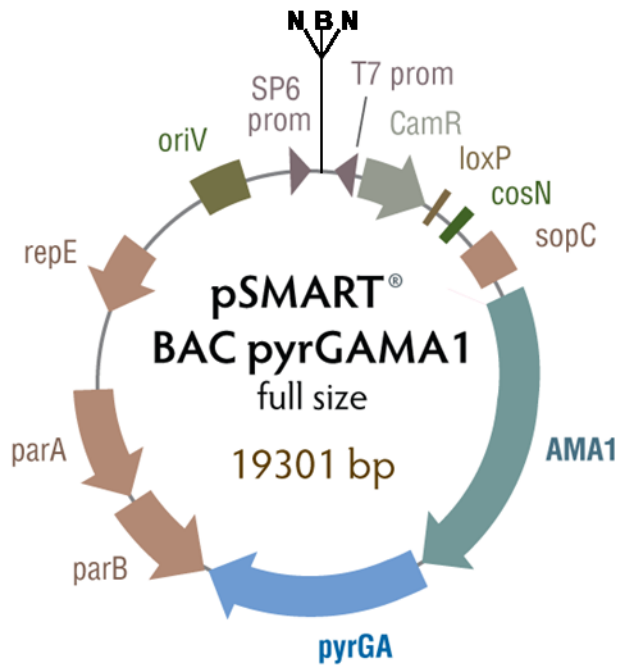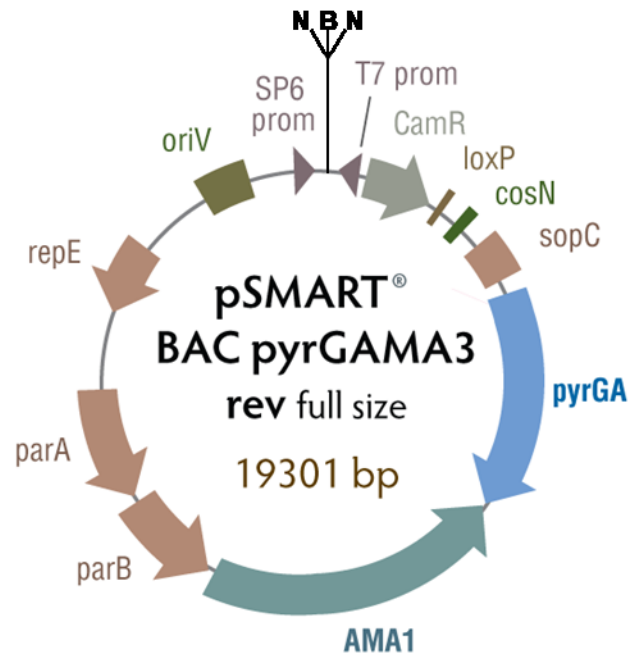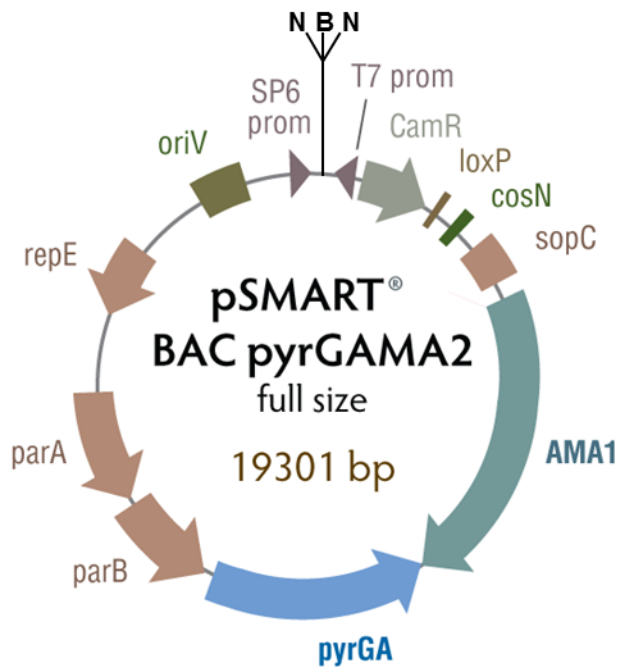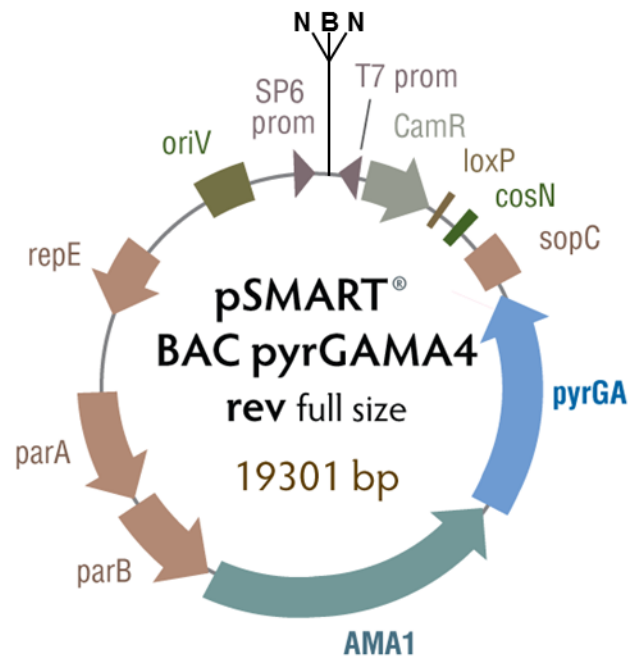

28

29

30

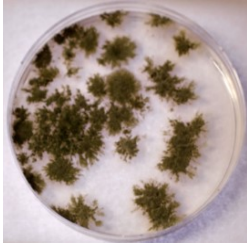

31 **b**

32

33

34

35 **Figure S1.** Panel a: FAC vectors: pSMARTBACpyrGAMA1~4, each has two *Not* I sites  
36 (N) flanking the cloning site (B, *Bst* XI) within the BAC end sequencing primers SP6 and  
37 T7. In addition to the chloramphenicol resistance gene (*camR*), *loxP* and *cos* sites, *pyrGA*  
38 represents the *pyrG* gene from *Aspergillus parasiticus*, AMA1 is the replication origin of  
39 fungal artificial chromosome, genes *parA* and *parB* are for active partitioning and gene  
40 *sopC* is to ensure that each daughter cell gets a copy of the shuttle BAC plasmid, gene  
41 *repE* is for BAC plasmid replication and regulation of copy number, and *oriV* is the BAC  
42 replication origin. Panel b: *A. nidulans* FAC transformants using pSMARTBACpyrGAMA3  
43 vector.

44

45

46

47

48

49

50

51

52

53

54

55

56

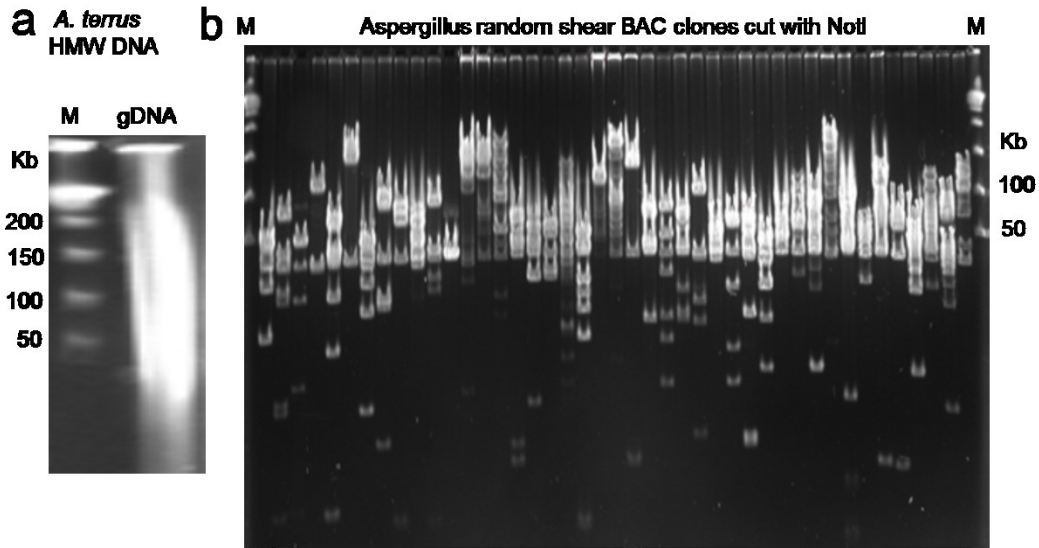

57  
 58  
 59  
 60  
 61  
 62  
 63  
 64  
 65  
 66  
 67  
 68  
 69  
 70  
 71  
 72  
 73  
 74  
 75

**Figure S2.** Preparation of HMW genomic DNA from *A. terreus* and random shear FAC cloning results. Panel a: *A. terreus* HMW genomic DNA ranging from 20~200kb. Panel b: CHEF gel electrophoresis and *NotI* digestion of random selected FAC clones, the average insert size was estimated at ~110kb. M, Lambda ladder Marker.

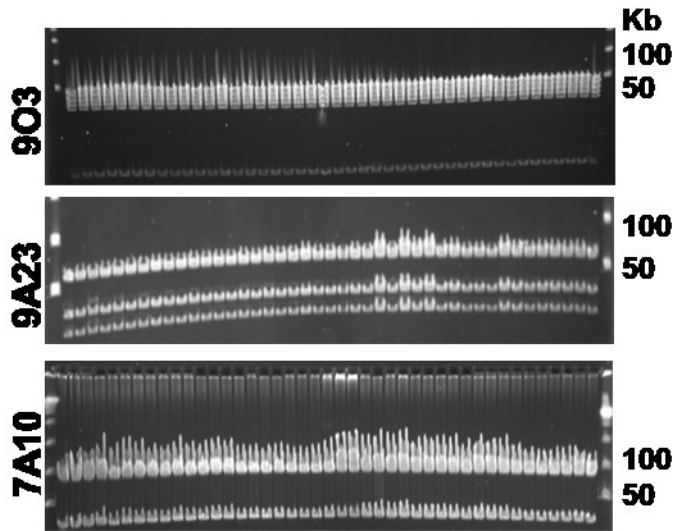

76

77

78

79 **Figure S3.** Three additional CHEF gels of *E. coli-Aspergillus* shuttle FACs that were  
 80 successfully transferred from transformed strains of *A. nidulans* back into *E. coli*. The  
 81 examples of recovered FAC clones shown here include 9O3 (cluster 30, ~100 kb), 9A23  
 82 (cluster 25, ~80 kb), and 7A10 (cluster 56, ~90kb) from top to bottom panel. The first and  
 83 last lanes are DNA Lambda ladder Markers, the 2<sup>nd</sup> and 3<sup>rd</sup> lane(s) on the left hand side  
 84 of the gels is the control FAC used to transform *A. nidulans*, and all of other lanes are  
 85 randomly selected FAC clones recovered. All control and recovered FACs were digested  
 86 with *Not I*.

87

88

89

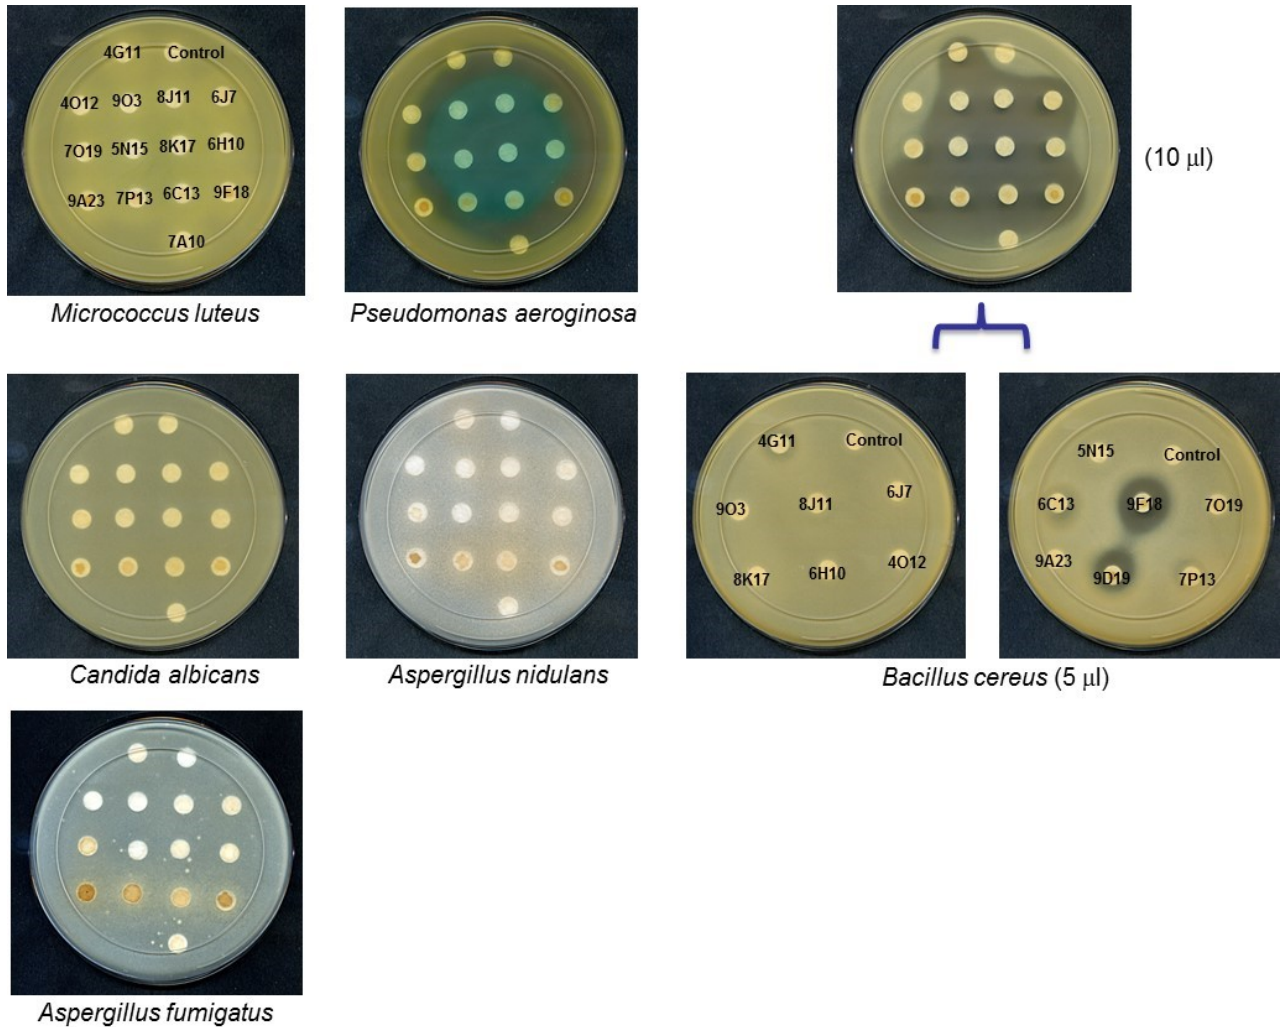

90

91

92 **Figure S4.** Antibiotic activity test of 14 FAC clones. Ten µl out of 150 µl methanol extract  
93 from FAC transformants cultured on GMM plate for 7 days at 37 °C was loaded on small  
94 disc (diameter: 1cm) for antimicrobial activity test against *Aspergillus* spp., *Candida*  
95 *albicans*, *Bacillus cereus*, *Micrococcus luteus* and *Pseudomonas aeruginosa*. Antibiotic  
96 activity was observed against *Bacillus cereus* with two FAC extracts.
