# Supplementary material for: Fungal artificial chromosomes for mining of the fungal secondary metabolome
Source: PubMed Central journal article supplement (PMC4413528; doi:10.1186/s12864-015-1561-x), 2015-04-29
Supplement: 12864_2015_1561_MOESM2_ESM.pdf [file 12864_2015_1561_MOESM2_ESM.pdf]

1 **Additional file\_2**

2

3 **Fungal artificial chromosome mining of the fungal secondary metabolome**

4

5

6

7 Jin Woo Bok<sup>1,†</sup>, Rosa Ye<sup>2,4,†</sup>, Kenneth D Clevenger<sup>3,†</sup>, David Mead<sup>4</sup>, Megan Wagner<sup>4</sup>,  
8 Amanda Krerowicz<sup>4</sup>, Jessica C Albright<sup>5</sup>, Anthony W Goering<sup>6</sup>, Paul M Thomas<sup>3,6</sup>, Neil L  
9 Kelleher<sup>3,5,6\*</sup>, Nancy P Keller<sup>1\*</sup>, Chengcang C Wu<sup>2,4\*</sup>

10

11 <sup>1</sup>Department of Medical Microbiology and Immunology and Bacteriology, University of  
12 Wisconsin at Madison, Madison, Wisconsin, USA. <sup>2</sup>Intact Genomics, Inc. St Louis,  
13 Missouri, USA. <sup>3</sup>Proteomics Center of Excellence, Northwestern University, Evanston,  
14 Illinois, USA. <sup>4</sup>Lucigen Corporation, Middleton, Wisconsin, USA. <sup>5</sup>Department of  
15 Chemistry, Northwestern University, Evanston, Illinois, USA. <sup>6</sup>Department of Molecular  
16 Biosciences, Northwestern University, Evanston, Illinois, USA.

17

18 †These authors contributed equally to this work.

19 \*Correspondence should be addressed to CCW ([cwu@intactgenomics.com](mailto:cwu@intactgenomics.com)), NPK  
20 ([npkeller@wisc.edu](mailto:npkeller@wisc.edu)), or NLK ([n-kelleher@northwestern.edu](mailto:n-kelleher@northwestern.edu))

21

22

23

24

25

26 **Supplemental Tables**

27

28 **Table S1.** BAC clones covering 56 SM clusters identified by both BAC end sequences.

| 29 SM Cluster No. | SM-BAC Clones                                           |
|-------------------|---------------------------------------------------------|
| 30 1              | 4H7, 10N10, 4O23, 8P5, 10L6, 3O5                        |
| 31 2              | 9H24, 9K17, 3O16, 9C14                                  |
| 32 3              | 10N3, 4P7, 7P21, 6I14, 10B14, 6G18                      |
| 33 4              | 2G12, 9C7, 3K24, 8I15, 6K21, 3P14                       |
| 34 5              | 7C11, 3K10                                              |
| 35 6              | 10H6, 9B18, 5G4, 10P8, 8K11, 4A15                       |
| 36 7              | 8P6, 6P5, 7D23, 8L16                                    |
| 37 8              | 10G4, 4G18, 5P8, 7G6, 6G20, 10N5                        |
| 38 9              | 3P8, 5L9, 9F19                                          |
| 39 10             | 3K24, 1L4, 6H11, 5K16, 9L23                             |
| 40 11             | 4O12,6O11                                               |
| 41 12             | 8G17, 6L14, 6F2, 9F16, 3I5                              |
| 42 13             | 5O9, 4L17, 4K8, 4M15, 8L11, 3M21, 5O21, 6C4             |
| 43 14             | 8M12, 8A13, 3J12, 7D9, 6M9, 10O6, 6O16                  |
| 44 15             | 9P15, 10C14, 9N7, 5J3, 6D6, 3O11                        |
| 45 16             | 9G06, 10O1, 3F16, 5L24, 3N22, 7K5, 5L3                  |
| 46 17             | 3I8                                                     |
| 47 18             | 6H12, 3F17, 4E23                                        |
| 48 19             | 8K17, 5F18, 10J7, 3A20, 3I4, 9D16, 7A13                 |
| 49 20             | 9D11, 8O18, 4G19, 9J14                                  |
| 50 21             | 4G11, 7J1, 4O20, 10C20, 8D24, 5M23, 5P9, 3H3, 3F2, 1H24 |
| 51 22             | 10E11, 8P23, 10F12, 10K23, 6H2, 2M14, 6E8               |
| 52 23             | 3D6, 9D19, 2E2, 7O23, 3F13                              |
| 53 24             | 10J22, 10E17, 6J17, 6L10, 7K4                           |
| 54 25             | 9A23, 10A2, 6K2, 9A23                                   |
| 55 26             | 6K2, 10A2, 10N6, 6E22                                   |
| 56 27             | 4O15, 4E15, 7L1, 6I16, 7O24                             |
| 57 28             | 10P13, 5G14, 3G11, 3B22                                 |

|    |    |                                                      |
|----|----|------------------------------------------------------|
| 58 | 29 | 3E2, 6P16, 6J4                                       |
| 59 | 30 | 9O3, 9E16, 6H14, 4E12, 9K13                          |
| 60 | 31 | 7K15, 9K21, 9M17, 9A1, 4E14, 7E16                    |
| 61 | 32 | 2M16                                                 |
| 62 | 33 | 6A19, 6F11, 10J4, 6K15, 10B8, 5N9                    |
| 63 | 34 | 1F7, 5M17, 6N10                                      |
| 64 | 35 | 9B9, 3F14, 1L3, 10O14, 8O21                          |
| 65 | 36 | 9H19, 7I8, 8F13                                      |
| 66 | 37 | 4N23, 8G6, 3L5                                       |
| 67 | 38 | 7O19, 7G7, 6I20, 10J23, 3F9, 3E18                    |
| 68 | 39 | 5N15, 8P7, 10O23, 9P11, 6D7, 9F12, 9N14, 10C15, 5I22 |
| 69 | 40 | 5L7, 4B5, 7P5, 3C6, 8I8                              |
| 70 | 41 | 6C13, 1H5, 4G24, 9D1, 8A17                           |
| 71 | 42 | 10E15, 4I9, 5H24                                     |
| 72 | 43 | 6M16, 9A21                                           |
| 73 | 44 | 6J7, 5K20, 5J19, 6H11, 5C17, 9L13                    |
| 74 | 45 | 3O2, 9I11, 2E10, 1H1                                 |
| 75 | 46 | 5B9, 8N10                                            |
| 76 | 47 | 7J7, 9D10, 4J17, 2C8, 2O20                           |
| 77 | 48 | 3B4, 6C8, 1H18, 6N20                                 |
| 78 | 49 | 6I22, 9O22, 9N18                                     |
| 79 | 50 | 7P13, 3N1, 5C10, 3N7                                 |
| 80 | 51 | 7M4, 7N2, 7D6, 5N17, 2O2                             |
| 81 | 52 | 8J19, 3N4, 9J13, 5O19, 7N2, 7D6, 9J13, 5N17          |
| 82 | 53 | 6N3, 4A22, 10K22, 7M9                                |
| 83 | 54 | 3F4, 7A11, 1J21, 10A15, 3M10, 8F11, 6O3, 7M15, 9D9   |
| 84 | 55 | 9F18, 10B4, 7G5, 8L22, 8J14, 8A11                    |
| 85 | 56 | 7A10, 3F5, 4J1, 5N4, 9A3, 8F12, 9K12                 |

86

---
