# Supplementary material for: Fungal artificial chromosomes for mining of the fungal secondary metabolome
Source: PubMed Central journal article supplement (PMC4413528; doi:10.1186/s12864-015-1561-x), 2015-04-29
Supplement: 12864_2015_1561_MOESM3_ESM.pdf [file 12864_2015_1561_MOESM3_ESM.pdf]

1 **Additional file\_3**

2

3 **Fungal artificial chromosome mining of the fungal secondary metabolome**

4

5

6

7 Jin Woo Bok<sup>1,†</sup>, Rosa Ye<sup>2,4,†</sup>, Kenneth D Clevenger<sup>3,†</sup>, David Mead<sup>4</sup>, Megan Wagner<sup>4</sup>,  
8 Amanda Krerowicz<sup>4</sup>, Jessica C Albright<sup>5</sup>, Anthony W Goering<sup>6</sup>, Paul M Thomas<sup>3,6</sup>, Neil L  
9 Kelleher<sup>3,5,6\*</sup>, Nancy P Keller<sup>1\*</sup>, Chengcang C Wu<sup>2,4\*</sup>

10

11 <sup>1</sup>Department of Medical Microbiology and Immunology and Bacteriology, University of  
12 Wisconsin at Madison, Madison, Wisconsin, USA. <sup>2</sup>Intact Genomics, Inc. St Louis,  
13 Missouri, USA. <sup>3</sup>Proteomics Center of Excellence, Northwestern University, Evanston,  
14 Illinois, USA. <sup>4</sup>Lucigen Corporation, Middleton, Wisconsin, USA. <sup>5</sup>Department of  
15 Chemistry, Northwestern University, Evanston, Illinois, USA. <sup>6</sup>Department of Molecular  
16 Biosciences, Northwestern University, Evanston, Illinois, USA.

17

18 †These authors contributed equally to this work.

19 \*Correspondence should be addressed to CCW ([cwu@intactgenomics.com](mailto:cwu@intactgenomics.com)), NPK  
20 ([npkeller@wisc.edu](mailto:npkeller@wisc.edu)), or NLK ([n-kelleher@northwestern.edu](mailto:n-kelleher@northwestern.edu))

21

22

23

24

25

26 **Table S2.** PCR primers used in this study.

| 27 | Name              | Sequence                  |
|----|-------------------|---------------------------|
| 28 |                   |                           |
| 29 | <b>6J7</b>        |                           |
| 30 | <b>ATEG_08423</b> |                           |
| 31 | 8423F             | 5'TATCTATGCCCTCGGGGTGTGG  |
| 32 | 8423R             | 5'AGTCATTGCTGCCCATGAACGGG |
| 33 | <b>ATEG_08424</b> |                           |
| 34 | 8424F             | 5'TCTCCAATCTACTGTCCACCCC  |
| 35 | 8424R             | 5'TCTCGATCGGTAAGCGACAAGC  |
| 36 | <b>ATEG_08425</b> |                           |
| 37 | 8425F             | 5'TTGGACTGCACTCATGCAAGGC  |
| 38 | 8425R             | 5'TTTCTTCAGCAGTTGCGGACC   |
| 39 | <b>ATEG_08426</b> |                           |
| 40 | 8426F             | 5'ACAGCAAGGT CCTGCTGTCTGC |
| 41 | 8426R             | 5'TTCAACTGCCACCCAGCCTCC   |
| 42 | <b>ATEG_08427</b> |                           |
| 43 | 8427F             | 5'TCTCGGGACTTCAGGTCACTCC  |
| 44 | 8427R             | 5'TAACCTTCTGGAACGCGTCTGC  |
| 45 | <b>ATEG_08428</b> |                           |
| 46 | 08428F            | 5'ACATATGCCCAACTCGATGCGC  |
| 47 | 08428R            | 5'TCCGTCATTTCGCAGATGTAGGC |
| 48 | <b>ATEG_08429</b> |                           |
| 49 | 8429F             | 5'TAGTCCACAAACCTACGCTCCG  |
| 50 | 8429R             | 5'CACATTACCATTTCCATGGGCG  |
| 51 | <b>ATEG_08430</b> |                           |
| 52 | 8430F             | 5'ACGCTATACCAGCAG TCTACCG |
| 53 | 8430R             | 5'AAGGTCCTTTTGGACCTCAGGG  |
| 54 | <b>ATEG_08431</b> |                           |
| 55 | 8431F             | 5'ATACGGAGAGACGTGTCCCTCG  |
| 56 | 8431R             | 5'ACGTGTTTCGTTGAACCCCGAGG |
| 57 |                   |                           |
| 58 |                   |                           |
| 59 | <b>9D19</b>       |                           |
| 60 | <b>ATEG_04319</b> |                           |
| 61 | 4319F             | 5'ATTCCAGCAGTACGCTCTGGG   |
| 62 | 4319R             | 5'ATGTCTCAATCGCCTCTCGCC   |
| 63 | <b>ATEG_04321</b> |                           |
| 64 | 4321F             | 5'AACGCAGAAGAAGGCGACTCG   |
| 65 | 4321R             | 5'TTGCCCTTTGAGGAGGCCTTCG  |
| 66 | <b>ATEG_04322</b> |                           |
| 67 | 4322F             | 5'TCTGGGAGCAGAGTCTCAAGG   |
| 68 | 4322R             | 5'TAATCTCCTGCAGAGACCTCTGG |
| 69 | <b>ATEG_04323</b> |                           |
| 70 | 4323F             | 5'TCGGAAACTATAGCGCAGCGG   |
| 71 | 4323R             | 5'ACTCGTGGGATCGAGAATCGC   |

|    |                   |                           |
|----|-------------------|---------------------------|
| 72 | <b>ATEG_04324</b> |                           |
| 73 | 4324F             | 5'TCTGGAAGAAGACGGCGAAGC   |
| 74 | 4324R             | 5'ATCCTGTTGCAGGAGGATGCC   |
| 75 | <b>ATEG_04325</b> |                           |
| 76 | 4325F             | 5'TCTTTACGGCCTTCACGGTCG   |
| 77 | 4325R             | 5'GAGAAAGAGCCAGGATGATGGG  |
| 78 | <b>ATEG_04326</b> |                           |
| 79 | 4326F             | 5'ACATCCATGTCTCGCTGACCG   |
| 80 | 4326R             | 5'AACTGGATCAGCATCCCACCC   |
| 81 | <b>ATEG_04327</b> |                           |
| 82 | 4327F             | 5'AAATCGACAGACTCCCCCAGC   |
| 83 | 4327R             | 5'AGGCAAGCCTCATTATCCGGG   |
| 84 | <b>ATEG_04328</b> |                           |
| 85 | 4328F             | 5'AGTTGCGATCCATGGTTTCCTCC |
| 86 | 4328R             | 5'TTTTCAGCTCTGCCGAGTCGC   |

---
